# Supplementary material for: Phytostimulatory Influence of Comamonas testosteroni and Silver Nanoparticles on Linum usitatissimum L. under Salinity Stress
Source: MDPI journal article supplement (doi:10.3390/plants10040790), 2021-04-16
Supplement: s1 [file s1]

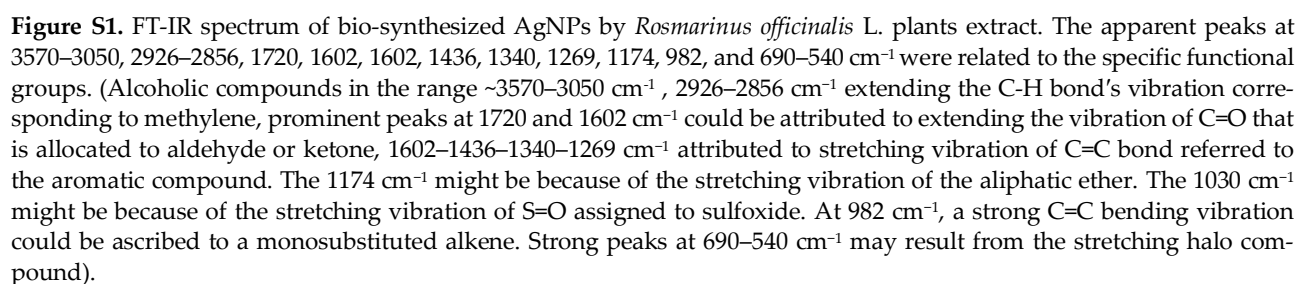

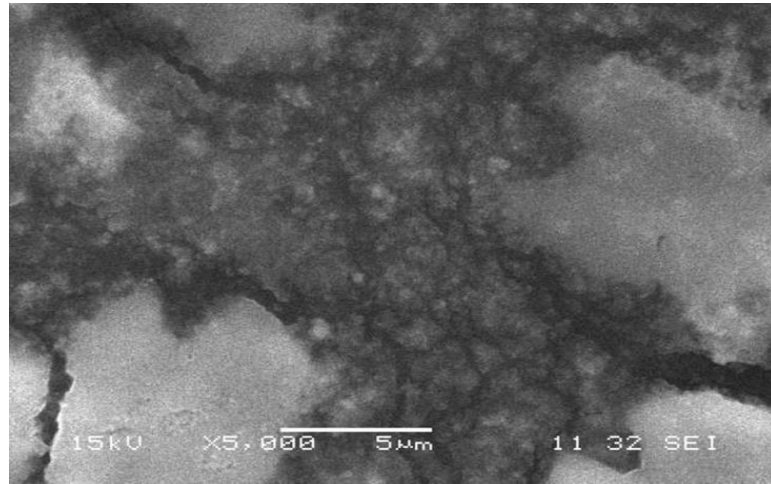

**Figure S2.** SEM micrograph of AgNPs bio-synthesized by *Rosmarinus officinalis* L. plants extract. Ag-nanoparticles are cuboid with approximately grain diameter of 75 nm,
